# Supplementary material for: US Food and Drug Administration Approvals of Drugs and Devices Based on Nonrandomized Clinical Trials: A Systematic Review and Meta-analysis
Source: PubMed Central journal article supplement — JAMA Netw Open. 2019 Sep 11;2(9):e1911111. doi: 10.1001/jamanetworkopen.2019.11111 (PMC6739727; doi:10.1001/jamanetworkopen.2019.11111), 2019-09-11
Supplement: jamanetwopen-2-e1911111-s001.pdf [file jamanetwopen-2-e1911111-s001.pdf]

## Supplementary Online Content

Razavi M, Glasziou P, Klocksieben FA, Ioannidis JPA, Chalmers I, Djulbegovic B. US Food and Drug Administration approvals of drugs and devices based on nonrandomized clinical trials: a systematic review and meta-analysis. *JAMA Netw Open*. 2019;2(9):e1911111. doi:10.1001/jamanetworkopen.2019.11111

**eFigure.** Distribution of Magnitude of Treatment Effects as a Function of FDA Preference for Testing of Approved Treatments in Further Randomized Controlled Trials (RCTs)

**eTable 1.** Characteristics of Included Drugs

**eTable 2.** Characteristics of Included Devices

This supplementary material has been provided by the authors to give readers additional information about their work.

### eFigure. Distribution of Magnitude of Treatment Effects as a Function of FDA Preference for Testing of Approved Treatments in Further Randomized Controlled Trials (RCTs)

The treatment effects expressed as natural logarithms of odds ratio [ln(OR)] were significantly larger among drugs and devices authorized without further requests for RCTs than for those for which FDA would have preferred additional testing in RCTs.

Figure S1A; Drugs only (p=0.02); Figure S1B: combined drugs and devices (p=0.03).

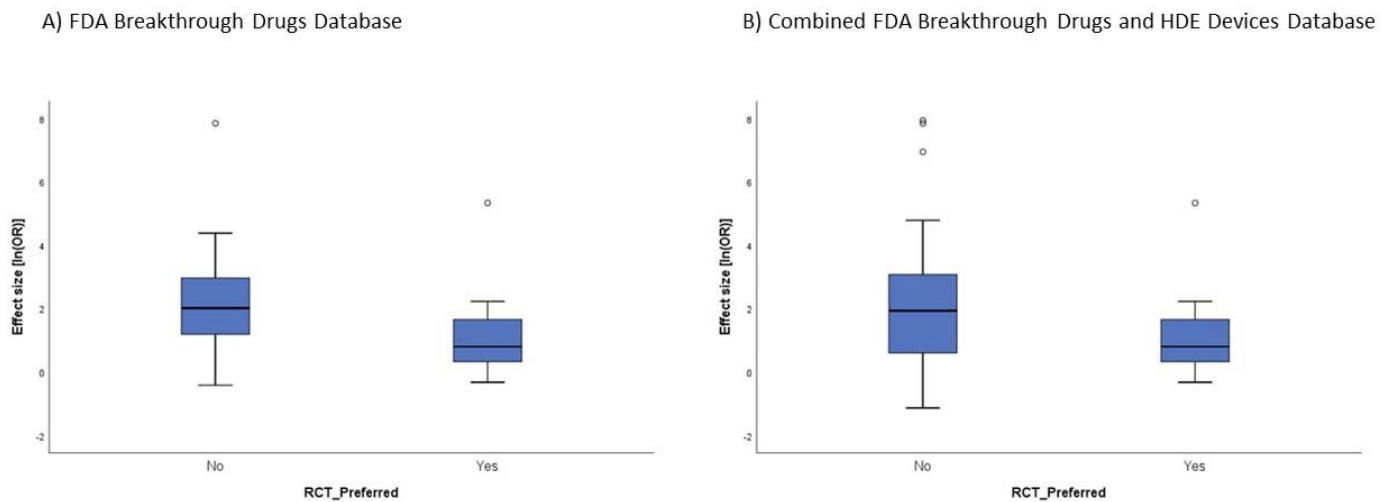

**eTable 1. Characteristics of Included Drugs**

| Active substance (FDA name)<br>Year of approval | Condition                                                                                                                                        | Primary outcome         | Experimental Favorable Results %<br>n/N | Control                                                      | Control Favorable Results %<br>n/N | Comment                                                                           | RCT desired |
|-------------------------------------------------|--------------------------------------------------------------------------------------------------------------------------------------------------|-------------------------|-----------------------------------------|--------------------------------------------------------------|------------------------------------|-----------------------------------------------------------------------------------|-------------|
| Alectinib (Alencensa)<br>2015                   | Anaplastic lymphoma kinase (ALK) positive metastatic non-small cell lung cancer, who have progressed on or are intolerant to crizotinib          | Objective response rate | 42%<br>94/225                           | Active treatment with chemotherapy (docetaxel or pemetrexed) | 20%<br>34/174                      | Comparator was cited in approval document under current treatment options.        | Yes         |
| Brigatinib (Alunbrig)<br>2017                   | Locally advanced or metastatic ALK-positive non-small cell lung cancer (NSCLC) who had progressed on crizotinib                                  | Overall response rate   | 50%<br>112/222                          | Active treatment with ceritinib                              | 58%<br>75/130                      | Comparator was cited in main study used for approval.                             | Yes         |
| Ofatumumab (Arzerra)<br>2014                    | Chronic lymphocytic leukemia refractory to fludarabine-containing treatment and failed or are inappropriate for alemtuzumab-containing treatment | Overall response rate   | 49%<br>67/138                           | Standard treatment                                           | 15%<br>21/138                      | Comparator data was extracted from sample size calculation in FDA summary review. | Yes         |
| Avelumab (Bavencio)<br>2017                     | Metastatic Merkel cell carcinoma                                                                                                                 | Overall response rate   | 33%<br>29/88                            | Second line chemotherapy (e.g. topotecan, paclitaxel, etc.)  | 23%<br>7/30                        | Comparator data was referenced in the discussion section of FDA document.         | No          |

|                                  |                                                                                                                                                                                                                       |                                                                             |                |                                                  |                 |                                                                                                                         |     |
|----------------------------------|-----------------------------------------------------------------------------------------------------------------------------------------------------------------------------------------------------------------------|-----------------------------------------------------------------------------|----------------|--------------------------------------------------|-----------------|-------------------------------------------------------------------------------------------------------------------------|-----|
| Blinatumomab (Blincyto) 2014     | Ph-relapsed or refractory B-precursor acute lymphocytic leukemia (ALL)                                                                                                                                                | Complete remission + complete remission with partial hematological recovery | 42%<br>77/185  | Standard treatment                               | 30%<br>56/185   | Comparator data was extracted from FDA document as the pre-specified efficacy threshold.                                | Yes |
| Cerliponase alfa (Brineura) 2017 | Symptomatic pediatric patients with late infantile neuronal ceroid lipofuscinosis type 2 (CLN2) disease                                                                                                               | Decline in the motor domain of the CLN2 clinical rating scale               | 95%<br>21/22   | No active treatment (natural history of disease) | 50%<br>21/42    | Comparator data was extracted from FDA document (historical control).                                                   | No  |
| Acalabrutinib (Calquence) 2017   | Mantle-cell lymphoma in adults who have received at least one prior therapy                                                                                                                                           | Overall response rate                                                       | 81%<br>100/124 | Active treatment with bortezomib                 | 31%<br>48/155   | Comparator was cited in FDA document under current treatment options.                                                   | Yes |
| Daratumumab (Darzalex) 2015      | Multiple myeloma (received at least three prior lines of therapy including a proteasome inhibitor and an immunomodulatory agent or who are double refractory to a proteasome inhibitor and an immunomodulatory agent) | Overall response rate                                                       | 29%<br>31/106  | Active treatment with dexamethasone              | 19%<br>201/1056 | Dexamethasone was mentioned in FDA document as a possible comparator. Comparator study was found through a PICO search. | No  |

|                              |                                                                                          |                       |               |                                                    |               |                                                                                                 |     |
|------------------------------|------------------------------------------------------------------------------------------|-----------------------|---------------|----------------------------------------------------|---------------|-------------------------------------------------------------------------------------------------|-----|
| Ibrutinib (Imbruvica-1) 2013 | Relapsed or refractory mantle-cell lymphoma                                              | Overall response rate | 66%<br>73/111 | Active treatment with bortezomib (velcade)         | 31%<br>48/155 | Comparator was cited in approval document under current treatment options.                      | Yes |
| Ibrutinib (Imbruvica-2) 2015 | Waldenstrom's macroglobulinemia-received at least one previous treatment                 | Overall response rate | 62%<br>39/63  | Standard treatment                                 | 19%<br>12/63  | Comparator data was extracted from sample size calculation in main study used for FDA approval. | No  |
| Ibrutinib (Imbruvica-3) 2017 | Chronic graft versus host disease after failure of one or more lines of systemic therapy | Overall response rate | 67%<br>28/42  | Active treatment with extracorporeal photopheresis | 64%<br>27/42  | Comparator was cited in main study used for approval.                                           | Yes |

|                                 |                                                                                                                                                                                                                                                               |                                              |               |                                                                                                                                               |               |                                                                                                                                      |     |
|---------------------------------|---------------------------------------------------------------------------------------------------------------------------------------------------------------------------------------------------------------------------------------------------------------|----------------------------------------------|---------------|-----------------------------------------------------------------------------------------------------------------------------------------------|---------------|--------------------------------------------------------------------------------------------------------------------------------------|-----|
| Durvalumab (Imfinzi) 2017       | Locally advanced or metastatic urothelial carcinoma who have disease progression during or following platinum-containing chemotherapy or have disease progression within 12 months of neoadjuvant or adjuvant treatment with platinum containing chemotherapy | Overall response rate                        | 17%<br>31/182 | Active treatment with atezolizumab                                                                                                            | 15%<br>45/310 | Comparator was cited in main study used for approval.                                                                                | Yes |
| Sebelipase alfa (Kanuma) 2015   | Lysosomal acid lipase deficiency (Wolman disease patient population)-infantile onset                                                                                                                                                                          | Number of patients alive at 12 months of age | 67%<br>6/9    | No active treatment (natural history of disease)                                                                                              | 0%<br>0/21    | Comparator data was extracted from FDA document (historical control).                                                                | No  |
| Pembrolizumab (Keytruda-1) 2014 | Unresectable or metastatic melanoma and disease progression following ipilimumab, and if BRAF V600 mutation positive, a BRAF inhibitor                                                                                                                        | Overall response rate                        | 24%<br>21/89  | Active treatment with investigator-choice chemotherapy (paclitaxel + carboplatin, paclitaxel, carboplatin, dacarbazine, or oral temozolomide) | 4%<br>8/179   | Comparator data was extracted from RCT of pemrolizumab versus investigator-choice chemotherapy published after the date of approval. | Yes |
| Pembrolizumab (Keytruda-2) 2015 | Metastatic, PD-L1 positive, non-small cell lung cancer with disease progression on or after platinum-containing chemotherapy (tumor proportion score of 50% or greater)                                                                                       | Overall response rate                        | 41%<br>25/61  | Active treatment with docetaxel                                                                                                               | 8%<br>12/152  | Comparator data was extracted from RCT of pemrolizumab versus docetaxel published after the date of approval.                        | No  |

|                                        |                                                                                                                                                 |                         |                |                                           |               |                                                                                                 |     |
|----------------------------------------|-------------------------------------------------------------------------------------------------------------------------------------------------|-------------------------|----------------|-------------------------------------------|---------------|-------------------------------------------------------------------------------------------------|-----|
| Pembrolizumab (Keytruda-3) 2017        | Microsatellite instability-high cancer                                                                                                          | Overall response rate   | 40%<br>59/149  | Active treatment with opdivo              | 31%<br>23/74  | Comparator data was found by literature search using PICO.                                      | No  |
| Pembrolizumab (Keytruda-4) 2017        | Locally advanced or metastatic urothelial carcinoma who were not eligible for cisplatin-containing chemotherapy                                 | Overall response rate   | 29%<br>107/370 | Active treatment with atezolizumab        | 23%<br>27/119 | Comparator was cited in main study used for approval.                                           | Yes |
| Pembrolizumab (Keytruda-5) 2017        | Refractory Hodgkin's lymphoma (3 or more prior lines)                                                                                           | Overall response rate   | 69%<br>145/210 | Active treatment with brentuximab vedotin | 75%<br>77/102 | Comparator was cited in main study used for approval.                                           | Yes |
| Axicabtagene ciloleucel (Kymriah) 2017 | Relapsed or refractory aggressive B-cell non-Hodgkin lymphoma                                                                                   | Overall response rate   | 72%<br>73/101  | Standard treatment                        | 20%<br>20/101 | Comparator data was listed in main study used for approval as a historical control rate.        | No  |
| Nivolumab (Opdivo-1) 2016              | Classical Hodgkin's lymphoma-after failure of autologous HSCT and post-transplantation brentuximab vedotin                                      | Objective response rate | 65%<br>62/95   | Standard treatment                        | 20%<br>19/95  | Comparator data was extracted from sample size calculation in main study used for FDA approval. | No  |
| Nivolumab (Opdivo-2) 2017              | Locally advanced or metastatic urothelial carcinoma who had disease progression during or following platinum-containing chemotherapy or who had | Overall response rate   | 20%<br>53/270  | Standard treatment                        | 10%<br>27/270 | Comparator data was extracted from sample size calculation in                                   | Yes |

|                                                                |                                                                                                                                                  |                                              |                |                                |                |                                                                                                 |     |
|----------------------------------------------------------------|--------------------------------------------------------------------------------------------------------------------------------------------------|----------------------------------------------|----------------|--------------------------------|----------------|-------------------------------------------------------------------------------------------------|-----|
|                                                                | disease progression within 12 months of treatment                                                                                                |                                              |                |                                |                | main study used for FDA approval                                                                |     |
| Idarucizumab (Praxbind) 2015                                   | Reversal of anticoagulation effects of dabigatran in patients who presented with serious bleeding or who required urgent surgery or intervention | Normalization of dilute thrombin time        | 96%<br>65/68   | No active treatment            | 0%<br>0/68     | Comparator data was extracted from main study used for FDA approval.                            | No  |
| Eltrombopag (Promacta) 2014                                    | Severe aplastic anemia refractory to immunosuppressive therapy                                                                                   | Overall response rate (hematologic response) | 40%<br>17/43   | Standard treatment             | 9%<br>4/43     | Comparator data was extracted from sample size calculation in main study used for FDA approval. | No  |
| Rucaparib (Rubraca) 2016                                       | Advanced BRCA-mutant ovarian cancer who had progressed after 2 or more chemotherapies                                                            | Objective response rate                      | 54%<br>57/106  | Active treatment with olaparib | 34%<br>47/137  | Comparator was cited in FDA document under current treatment options.                           | Yes |
| Sofosbuvir + ribavirin + peg interferon alfa-2a (Sovaldi) 2013 | Hepatitis C infection-genotype 1, 4, 5, or 6 (treatment-naïve)                                                                                   | Overall sustained virologic response         | 90%<br>295/327 | Standard treatment             | 60%<br>196/327 | Comparator data was mentioned in FDA document as a historical control rate.                     | No  |



|                                                |                                                                                                                          |                                                       |                |                                                                           |               |                                                                                                                        |     |
|------------------------------------------------|--------------------------------------------------------------------------------------------------------------------------|-------------------------------------------------------|----------------|---------------------------------------------------------------------------|---------------|------------------------------------------------------------------------------------------------------------------------|-----|
| Asfotase alfa (Strensiq-1) 2015                | Perinatal/infantile onset hypophosphatasia                                                                               | Overall survival                                      | 91%<br>62/68   | No active treatment (natural history of disease)                          | 27%<br>13/48  | Comparator data was extracted from FDA document (historical control).                                                  | No  |
| Asfotase alfa (Strensiq-2) 2015                | Juvenile-onset hypophosphatasia                                                                                          | Radiographic global impression of change scores of +2 | 100%<br>8/8    | No active treatment (natural history of disease)                          | 6%<br>2/32    | Comparator data was extracted from FDA document (historical control).                                                  | Yes |
| Dabrafenib+Trametinib (Tafinlar+Mekinist) 2017 | Metastatic non-small cell lung cancer with BRAF V600E mutation                                                           | Overall response rate                                 | 62%<br>58/93   | Standard treatment (e.g. taxane, pemetrexed, erlotinib, crizotinib, etc.) | 8%<br>5/59    | Comparator was cited in main study used for approval.                                                                  | No  |
| Osimertinib (Tagrisso) 2015                    | Non-small cell lung cancer (with metastatic EGFR T790M mutation positive)-relapsed/refractory                            | Objective response rate                               | 59%<br>241/411 | Active treatment with platinum-pemetrexed                                 | 31%<br>44/140 | Comparator data was extracted from RCT of osimertinib versus platinum-pemetrexed published after the date of approval. | Yes |
| Atezolizumab (Tecentriq) 2015                  | Locally advanced or metastatic urothelial carcinoma who have disease progression during or following platinum containing | Objective response rate                               | 15%<br>46/310  | Standard treatment                                                        | 10%<br>31/310 | Comparator data was extracted from FDA document as a                                                                   | Yes |

|                                 |                                                                                                                                                                       |                       |               |                                                   |               |                                                                                                 |     |
|---------------------------------|-----------------------------------------------------------------------------------------------------------------------------------------------------------------------|-----------------------|---------------|---------------------------------------------------|---------------|-------------------------------------------------------------------------------------------------|-----|
|                                 | chemotherapy or have disease progression within 12 months of neoadjuvant or adjuvant treatment with platinum containing chemotherapy                                  |                       |               |                                                   |               | historical response rate.                                                                       |     |
| Venetoclax (Venclexta) 2016     | Chronic lymphocytic leukemia with 17p deletion, as detected by an FDA approved test, who have received at least one prior therapy                                     | Overall response rate | 79%<br>85/107 | Standard treatment                                | 40%<br>43/107 | Comparator data was extracted from sample size calculation in main study used for FDA approval. | Yes |
| Abemaciclib (Verzenio) 2017     | HR-positive, HER2-negative advanced or metastatic breast cancer with disease progression following endocrine therapy and prior chemotherapy in the metastatic setting | Overall response rate | 17%<br>23/132 | Active treatment with palbociclib and fulvestrant | 24%<br>32/132 | Comparator was cited in FDA document under current treatment options.                           | No  |
| Crizotinib (Xalkori) 2016       | Advanced non-small cell lung cancer with a ROS1 rearrangement                                                                                                         | Overall response rate | 72%<br>36/50  | Standard treatment                                | 10%<br>5/50   | Comparator data was extracted from sample size calculation in main study used for FDA approval. | No  |
| Tisagenlecleuel (Yescarta) 2017 | Relapsed or refractory B-cell acute lymphoblastic leukemia (ALL)                                                                                                      | Overall response rate | 83%<br>52/63  | Standard treatment                                | 20%<br>13/63  | Comparator data was extracted from sample size calculation in main study used for FDA approval. | No  |

|                                         |                                                                                                                                                                |                              |                       |                                        |                    |                                                                                    |           |
|-----------------------------------------|----------------------------------------------------------------------------------------------------------------------------------------------------------------|------------------------------|-----------------------|----------------------------------------|--------------------|------------------------------------------------------------------------------------|-----------|
| <p>Ceritinib<br/>(Zykadia)<br/>2014</p> | <p>Anaplastic lymphoma kinase-positive metastatic non-small cell lung cancer who have progressed on or are intolerant to crizotinib (prior ALK inhibitors)</p> | <p>Overall response rate</p> | <p>55%<br/>89/163</p> | <p>Active treatment with docetaxel</p> | <p>5%<br/>3/55</p> | <p>Comparator data was listed in FDA document under current treatment options.</p> | <p>No</p> |
|-----------------------------------------|----------------------------------------------------------------------------------------------------------------------------------------------------------------|------------------------------|-----------------------|----------------------------------------|--------------------|------------------------------------------------------------------------------------|-----------|

**eTable 2. Characteristics of Included Devices**

| FDA name<br>Year of approval                                 | Condition                                                                                                                                                                                 | Primary outcome            | Experimental<br>Favorable<br>Results %<br>n/N | Control                                                                                                                         | Control<br>Favorable<br>Results %<br>n/N | Comment                                                | RCT desired |
|--------------------------------------------------------------|-------------------------------------------------------------------------------------------------------------------------------------------------------------------------------------------|----------------------------|-----------------------------------------------|---------------------------------------------------------------------------------------------------------------------------------|------------------------------------------|--------------------------------------------------------|-------------|
| Abiocor<br>Replacement<br>Heart<br>(2006)                    | Severe biventricular<br>end stage heart<br>disease                                                                                                                                        | Survival beyond 60<br>days | 71%<br>10/14                                  | No active treatment                                                                                                             | 0%<br>0/14                               | Comparator data<br>is natural history<br>data.         | No          |
| Amplatzer Post<br>Infarct Muscular<br>VSD Occluder<br>(2017) | Post myocardial<br>infarct muscular<br>ventricular septal<br>defects in patients<br>who are not<br>satisfactory surgical<br>candidates                                                    | One-month survival         | 49%<br>19/39                                  | Medical therapy<br>(intravenous inotropic<br>medications and<br>intravenous diuretics<br>and mechanical<br>respiratory support) | 10%<br>4/39                              | Comparator was<br>reported in<br>approval<br>document. | No          |
| Argus II retinal<br>prosthesis system<br>(2013)              | Severe to profound<br>retinitis pigmentosa                                                                                                                                                | Object localization        | 96%<br>27/28                                  | Self-control: device<br>on vs device off                                                                                        | 0%<br>0/28                               | Comparator was<br>reported in<br>approval<br>document. | No          |
| Barostim neo<br>legacy system<br>(2014)                      | Resistant<br>hypertension<br>(previously had<br>bilateral<br>implantation of the<br>Rheos carotid sinus<br>leads and were<br>deemed responders<br>in the Rheos pivotal<br>clinical study) | Systolic blood<br>pressure | Mean (SD)<br>142.8 (26.4)                     | Self-control: baseline<br>vs 6 months                                                                                           | Mean (SD)<br>176.8 (21.3)                | Comparator data<br>is baseline data.                   | No          |

|                                                  |                                                                                                                                        |                                                                                                               |                |                                     |                |                                                                          |    |
|--------------------------------------------------|----------------------------------------------------------------------------------------------------------------------------------------|---------------------------------------------------------------------------------------------------------------|----------------|-------------------------------------|----------------|--------------------------------------------------------------------------|----|
| CentriMag Right Ventricular Assist System (2008) | Acute cardiogenic shock due to acute right ventricular failure                                                                         | Survival to 30 days after device removal                                                                      | 50%<br>12/24   | Extracorporeal membrane oxygenation | 50%<br>14/28   | Comparator was reported and cited in the approval document.              | No |
| CoAxia NeuroFlo Catheter (2005)                  | Symptomatic cerebral vasospasm following aneurismal subarachnoid hemorrhage                                                            | Clinical improvement (decrease of greater than or equal to 3 points in NIHSS from baseline to 24 hours after) | 50%<br>8/16    | Standard medical management         | 37%<br>92/249  | Comparator was found in an outside search (RCT published after approval) | No |
| Contegra Pulmonary Valved Conduit (2003)         | Correction or reconstruction of the right ventricular outflow tract (RVOT)                                                             | Survival at one year                                                                                          | 88%<br>209/237 | Homograft                           | 84%<br>187/223 | Comparator was cited in approval document.                               | No |
| CPAX aneurysm treatment system (2011)            | Wide-necked large and giant-sized cerebral aneurysms (>10 mm) that require use of adjunctive assist devices such as stents or balloons | Percent of aneurysms $\geq$ 90% occluded at 90-day follow up                                                  | 67%<br>8/12    | Success criteria                    | 58%<br>7/12    | Comparator is reported in the FDA document as "success criteria"         | No |

|                                                                            |                                                                                                                                                                                                                              |                                     |                |                                                          |                |                                                                                 |    |
|----------------------------------------------------------------------------|------------------------------------------------------------------------------------------------------------------------------------------------------------------------------------------------------------------------------|-------------------------------------|----------------|----------------------------------------------------------|----------------|---------------------------------------------------------------------------------|----|
| DeBakey VAD Child system for humanitarian use in pediatric patients (2004) | NYHA Class IV end-stage heart failure, refractory to medical therapy                                                                                                                                                         | Survival to 30 days post-transplant | 63%<br>19/30   | Heartmate vented electric left ventricular assist system | 62%<br>173/280 | FDA document cited main study used for approval, which then cited a comparator. | No |
| Elana surgical Kit HUD (arteriotomy system) (2011)                         | Aneurysm or a skull base tumor affecting a large [ $>2.5$ mm], intracranial artery that failed balloon test occlusion, cannot be sacrificed, or cannot be treated with conventional means due to local anatomy or complexity | Bypass patent at 0-7 days post-op   | 77%<br>277/361 | Long saphenous vein bypass grafts                        | 86%<br>173/201 | Comparator reported in the approval document.                                   | No |
| Enterprise Vascular Reconstruction Device and Delivery System (2007)       | Wide-neck, intracranial, saccular or fusiform aneurysms arising from a parent vessel with a diameter of $\geq 3$ mm and $\leq 4$ mm                                                                                          | $\geq 95\%$ occlusion               | 57%<br>16/28   | Self-control: baseline vs 6 months                       | 0%<br>0/28     | Comparator data is baseline data.                                               | No |

|                                                     |                                                                                                                                                            |                                            |                        |                                     |                         |                                                                                            |    |
|-----------------------------------------------------|------------------------------------------------------------------------------------------------------------------------------------------------------------|--------------------------------------------|------------------------|-------------------------------------|-------------------------|--------------------------------------------------------------------------------------------|----|
| EXCOR pediatric ventricular assist device (2011)    | Severe isolated left ventricular or biventricular dysfunction who are candidates for cardiac transplant and require circulatory support-pediatric patients | Survival to transplant/successful recovery | 90%<br>43/48           | Extracorporeal membrane oxygenation | 66%<br>63/96            | Comparator data is reported in the FDA document as a historical control (active treatment) | No |
| Excorim immunoadsorption system (1998)              | Hemophilia A and B with factor VIII or IX inhibitor titers above 10 Bethesda units                                                                         | Bleeding resolved                          | 91%<br>20/22           | Prothrombin complex concentrates    | 50%<br>11/22            | Comparator was cited in the approval document                                              | No |
| FENIX continence restoration system (2015)          | Fecal incontinence in patients who are not candidates for or have previously failed conservative treatment and less invasive therapy options               | Fecal incontinence episodes per week       | Mean (SD)<br>3.4 (4.3) | Self-control: baseline vs 36 months | Mean (SD)<br>13.9 (6.7) | Comparator data is baseline data.                                                          | No |
| Flourish pediatric esophageal atresia device (2017) | Esophageal atresia without a tracheoesophageal fistula (TEF) or a TEF that has been closed as a result of a prior procedure                                | Successful creation of an anastomosis      | 100%<br>16/16          | Thoracoscopic repair                | 95%<br>58/61            | FDA document cited main study, which then cited a comparator.                              | No |

|                                                                              |                                                                                                                                                                                       |                                                     |               |                                                                                     |                  |                                                                                                             |    |
|------------------------------------------------------------------------------|---------------------------------------------------------------------------------------------------------------------------------------------------------------------------------------|-----------------------------------------------------|---------------|-------------------------------------------------------------------------------------|------------------|-------------------------------------------------------------------------------------------------------------|----|
| Impella RP System (2015)                                                     | Acute right heart failure or decompensation following left ventricular assist device implantation, myocardial infarction heart transplant, or open heart surgery (pediatric or adult) | Survival to 30 days/discharge/next therapy          | 73%<br>22/30  | Active treatment with CentriMag Right Ventricular Assist System                     | 58%<br>7/12      | Comparator cited in main study used for approval.                                                           | No |
| Jostent coronary stent graft (2001)                                          | Coronary artery perforation                                                                                                                                                           | Perforation closed/vessel sealed                    | 100%<br>41/41 | Intracoronary stenting                                                              | 58%<br>3750/3815 | FDA document cited main study, which then cited a comparator.                                               | No |
| Liposorber LA-15 system (2013)                                               | Nephrotic syndrome                                                                                                                                                                    | Remission of nephrotic syndrome                     | 63%<br>25/40  | Spontaneous remission                                                               | 5%<br>2/40       | FDA document cited main study, which then cited a comparator.                                               | No |
| LVIS and LVIS Jr Device (low profile visualized intraluminal support) (2014) | Unruptured, wide neck, intracranial, saccular aneurysms                                                                                                                               | Aneurysm angiographic occlusion of >90% at 6 months | 84%<br>26/31  | Self-control: baseline vs 6 month                                                   | 65%<br>20/31     | Comparator data is baseline data.                                                                           | No |
| Melody Transcatheter Pulmonary Valve (2010)                                  | Right ventricular outflow valve dysfunction                                                                                                                                           | Reoperation in 0-14 months                          | 99%<br>88/89  | Valve conduit stenting: a bovine jugular venous valve mounted into a platinum stent | 84%<br>49/58     | We proposed to study an effect for which the results were included in the comparator historical references. | No |



|                                                                           |                                                                                                                                                                                               |                                                   |                          |                                         |                          |                                                              |    |
|---------------------------------------------------------------------------|-----------------------------------------------------------------------------------------------------------------------------------------------------------------------------------------------|---------------------------------------------------|--------------------------|-----------------------------------------|--------------------------|--------------------------------------------------------------|----|
| Neuroform Microdelivery Stent System (2002)                               | Wide-neck, intracranial, saccular aneurysms                                                                                                                                                   | ≥95% occlusion                                    | 100%<br>26/26            | Natural history                         | 0%<br>0/26               | Comparator data is natural history data.                     | No |
| Neurolink System (2002)                                                   | Atherosclerotic disease in the neurovasculature refractory to medical therapy                                                                                                                 | One-year survival                                 | 87%<br>53/61             | Traditional medical therapy             | 72%<br>21/29             | Comparator data was reported and cited in approval document. | No |
| NeuRx DPS RA/4 Respiratory Stimulation System (2008)                      | Ventilator-dependent spinal cord injury                                                                                                                                                       | Survival                                          | 92%<br>46/50             | Mechanical ventilation via tracheostomy | 34%<br>17/50             | Comparator was cited in the main study used for approval.    | No |
| OPRA (Osseoanchored prostheses for the rehabilitation of amputees) (2015) | Transfemoral amputation due to trauma or cancer in patients who have rehabilitation problems with, or cannot use, a conventional socket prosthesis                                            | Mean prosthetic use score (higher is better)      | Mean (SD)<br>79.9 (27.1) | Self-control: baseline vs 24 months     | Mean (SD)<br>46.7 (36.7) | Comparator is baseline data.                                 | No |
| Possis Perma-Flow Coronary Bypass Graft (1998)                            | Single or multiple vessel coronary artery bypass in patients who are receiving coronary bypass grafting but who have inadequate autologous conduit to complete the required revascularization | Proportion of patients with NYHA classes I and II | 72%<br>23/32             | Self-control: baseline vs 6 months      | 28%<br>9/32              | Comparator was reported in approval document.                | No |

|                                                                  |                                                                                                                                    |                                                               |                         |                                     |                       |                                                                      |    |
|------------------------------------------------------------------|------------------------------------------------------------------------------------------------------------------------------------|---------------------------------------------------------------|-------------------------|-------------------------------------|-----------------------|----------------------------------------------------------------------|----|
| Reclaim DBS therapy for OCD (2009)                               | Chronic, severe, treatment-resistant obsessive-compulsive disorder (failed at least three selective serotonin reuptake inhibitors) | Yale Brown Obsessive Compulsive Scale score (lower is better) | Mean (SD)<br>20.2 (9.0) | Self-control: baseline vs 12 months | Mean (SD)<br>34 (2.5) | Comparator is baseline data.                                         | No |
| Shelhigh pulmonic valve conduit with "no-react" treatment (1999) | Diseased, damaged, or absent pulmonic artery (in children less than 4 years old)                                                   | Survival to 14 months                                         | 94%<br>44/47            | Pulmonary allografts                | 78%<br>31/40          | Comparator was cited in the approval document.                       | No |
| Therasphere (1999)                                               | Unresectable hepatocellular carcinoma                                                                                              | Objective response                                            | 20%<br>4/20             | Cisplatin                           | 14%<br>4/28           | Comparator was cited in main study used for approval.                | No |
| Urostim Bladder Stimulator (1997)                                | Neurogenic bladder disease secondary to spina bifida                                                                               | Increase in bladder capacity of 20%                           | 53%<br>316/597          | No active treatment                 | 17%<br>100/597        | Comparator based on clinical information included in FDA/HDE report. | No |
| VOCARE bladder system (1998)                                     | Complete spinal cord lesions with intact parasympathetic innervation of the bladder                                                | Voided > 200 mL in < 5 minutes (at 12 months)                 | 86%<br>18/21            | Self-control: device ON vs OFF      | 5%<br>1/21            | Comparator data was given in the approval document.                  | No |
| Wingspan Stent System with Gateway PTA Balloon Catheter (2005)   | High-grade, intracranial, atherosclerotic lesions                                                                                  | Survival at 6 months                                          | 90%<br>38/42            | Neurolink system                    | 83 %<br>40/48         | Comparator data was reported and cited in the approval document.     | No |

|                                                             |                                                                                                           |                 |              |                                       |               |                                               |    |
|-------------------------------------------------------------|-----------------------------------------------------------------------------------------------------------|-----------------|--------------|---------------------------------------|---------------|-----------------------------------------------|----|
| XVIVO perfusion system with STEEN solution perfusate (2014) | As an aid for ex vivo evaluation and perfusion of potential donor lungs prior to possible transplantation | 30-day survival | 97%<br>30/31 | Standard cold storage lung transplant | 100%<br>31/31 | Comparator was reported in approval document. | No |
|-------------------------------------------------------------|-----------------------------------------------------------------------------------------------------------|-----------------|--------------|---------------------------------------|---------------|-----------------------------------------------|----|
